# Supplementary material
Source: PubMed Central journal article supplement (PMC3117647)

## **SUPPLEMENTARY INFORMATION**

**Eed/Sox2 regulatory loop controls ES cell self-renewal through histone methylation and acetylation**

*Hiroki Ura, Kazuhiro Murakami, Tadayuki Akagi, Keita Kinoshita, Shukuro Yamaguchi, Shinji Masui, Hitoshi Niwa, Hiroshi Koide and Takashi Yokota*

Table S1. Primers for RT-PCR analysis

| Gene name                   | Forward primer            | Reverse primer             |
|-----------------------------|---------------------------|----------------------------|
| Eed                         | caacaccagccaccctctat      | gagaaggttgggtctcgtg        |
| Oct3/4                      | caaggcaaggagtagaca        | caaatgatgagtacagacagg      |
| Nanog <sup>1</sup>          | caccacccatgctagtctt       | accctcaaactcctggtcct       |
| STAT3                       | cacaggattgatcccaag        | cgaaagtcaggttggtgc         |
| Sox2, Sox2 cds <sup>2</sup> | gagtggaaactttgtccgaga     | gaagcgtgtacttatccttctcat   |
| Sox2 UTR <sup>2</sup>       | cccctttattttccgtagttgat   | gaagcgtgtacttatccttctcat   |
| Rex1 <sup>3</sup>           | gagattagccccgag           | cgccctgaggaagc             |
| Dax1 <sup>4</sup>           | tcctgtaccgcatctatgtg      | atctggaagcagggcaagta       |
| Fgf4 <sup>2</sup>           | gggaggctacagacagcaag      | ctgtgagccaccagacagaa       |
| Lefty1 <sup>2</sup>         | tgtgtgtgctctttgcttcc      | ggggattctgtccttggttt       |
| Fgf5 <sup>5</sup>           | gctgtgtctcagggattgt       | cactctcggcctgtcttttc       |
| T <sup>5</sup>              | ctccaacctatcggacaat       | ccattgctcacagaccagag       |
| Gata4 <sup>1</sup>          | ccctccctcttcaaattcc       | ctttccagagctccacctg        |
| Cdx2 <sup>2</sup>           | aggctgagccatgaggagta      | cgaggtcataattccactca       |
| Eomes <sup>1</sup>          | cctggtggtgtttgtgtg        | ttaatagcaccgggcactc        |
| Elp3                        | acaggggccatactgtgaag      | accaggggtgggtagagctt       |
| Tip60                       | ccaagaaaaggaatccaca       | tctgacaggggtttctcagg       |
| Myst3                       | gtcattctccggtgtgact       | agcagaggtgacgtgaggtt       |
| Myst4                       | tctcggaacagctggaactt      | tccaatccacattgcgtaga       |
| GCNF <sup>2</sup>           | acagtcctatgtaggaatcgaatga | catgcatttcataactaattggtcac |
| CouptfI <sup>2</sup>        | agagactaagaggactctcctgac  | tcctttccaatgtacttacagatca  |
| CouptfII <sup>2</sup>       | gtccaagacacaagctgaggt     | aatcacgttacctataagtccaac   |
| GAPDH                       | tgatgacatcaagaaggtggtgaag | tccttggaggccatgtaggcat     |

1. Toyooka et al. (2008) Development.135, 909-918.
2. Masui et al. (2007) Nat Cell Biol.9, 625-635.
3. Ura et al. (2008) J Biol Chem. 283, 9713-9723.
4. Sun et al. (2009) Mol Cell Biol. 29, 4574-4583.
5. Shimosato et al. (2007) BMC Dev Biol. 3, 80.

Table S2. Primers for ChIP analysis

| Gene name                               | Forward primer          | Reverse primer        |
|-----------------------------------------|-------------------------|-----------------------|
| Eed (Sox2 binding site) <sup>1</sup>    | gcataggaggagatttctga    | cccaaacacacctcatcgt   |
| Eed (-382/-12) <sup>1</sup>             | tcagaaaccggtggaagac     | tgcaaacgaacgaaagtctg  |
| CouptfII promoter                       | gcatccgagatgcttcattt    | caaatgatgagtgcagacagg |
| SRR1 (couptfII binding site)            | cataaacaccagccaccatt    | ggggtctggctaggtctctt  |
| SRR1 (-3917/-3783)                      | tttgaaccacagttgaca      | cattccgaggaagagcagac  |
| Oct4 promoter                           | cctaaggggtgtcctgtcca    | tcacctagggacggtttcac  |
| Nanog promoter                          | ccaatgtgaagagaagcaa     | tggcgtatcttagtgggaag  |
| Fgf4 promoter                           | ctgctgtcctgaatgtcct     | gtcacactgtggcttggcta  |
| Lefty1 promoter                         | ttctagacagccctctca      | tcttgagtctcggaggaaat  |
| Rex1 promoter                           | ggcatttgcataactgagca    | cttggaccctcccttttta   |
| Dax1 promoter                           | gtgctgagactctccctgg     | cgccgcttgggacttattta  |
| Nanog (Sox2 binding site) <sup>2</sup>  | gtctttagatcagaggatgcccc | ctaccaccccctattctcca  |
| Fgf4 (Sox2 binding site) <sup>2</sup>   | gggaggctacagacagcaag    | ctgtgagccaccagacagaa  |
| Lefty1 (Sox2 binding site) <sup>2</sup> | aagctgcagacttcattcca    | cgggggatagatgaagaaac  |
| Rex1 (Sox2 binding site)                | gcgatgggacgaaagtgtaa    | gggcaagactcttctcag    |
| Gata4 promoter <sup>1</sup>             | taatagggcctgtgattgctc   | aagcgctctttctcctccc   |
| T promoter <sup>1</sup>                 | gctgttggtagggagtcaa     | cagcgggaagaaacaaag    |
| Fgf5 promoter <sup>1</sup>              | atggggtcagagagga        | aagggaacaaaaactga     |
| Cdx2 promoter <sup>1</sup>              | acaatgccgacttttgaacc    | acctccccagttctccact   |
| Eomes promoter                          | ttctgtattgtccgcagag     | attccctctgctcggtttt   |

1. Ura et al. (2008) J Biol Chem. 283, 9713-9723.
2. Masui et al. (2007) Nat Cell Biol.9, 625-635.

## Figure legends

**Figure S1 Expression levels of *Eed* and *Sox2* are reduced in differentiating and *Eed*-deficient ES cells.** Wild-type ES cells were cultured for 0 to 6 days in the absence of LIF, and *Eed1* cKO ES cells were cultured with or without Tet for 4 days. Expression levels of the indicated genes were measured by qRT-PCR.

**Figure S2 *Eed* cannot suppress ES cell differentiation induced by *Sox2* downregulation.** (A) Morphology of *Eed*- and *Sox2*-expressing 2TS22C cells. 2TS22C cells transfected with *Eed1* or *Sox2* were cultured with or without Tet for 4 days. Scale bar = 50  $\mu$ m. (B) Ectopic expression of *Sox2*, but not *Eed*, induces compact colony formation of *Sox2*-deficient ES cells. *Sox2*-, *Eed1*-, or *Eed4*-expressing 2TS22C cells were cultured for 4 days in the presence of Tet. The number of cell colonies was counted manually, and the ratio of compact colonies to total colonies was determined. Three independent experiments were performed and more than 100 colonies were counted in each experiment. Bars represent the means and standard deviations. (C) Neither *Eed1*, nor *Eed4* suppresses the downregulation of self-renewal genes or induction of trophectodermal genes induced by *Sox2* depletion. Cells were cultured in the presence or absence of Tet for 4 days, and expression of the indicated genes was examined by qRT-PCR. Note that most Tet-treated 2TS22C ES cells differentiated into trophectoderm-like cells (Masui *et al*, 2007). (D) *Eed* restores H3K37me3 in the promoter regions of differentiation-associated genes. Cells were cultured with or without Tet for 4 days and subjected to ChIP assay using an anti-H3K37me3 antibody, followed by qPCR using primers for the promoter regions of

the indicated genes. It should be noted that the failure to suppress trophectodermal differentiation is not due to insufficient functional levels of *Eed* expression in 2TS22C ES cells, since the expression level of *Eed* is high enough to restore the reduced level of H3K37me3.

**Figure S3 Sox2 promotes histone acetylation in *Eed*-deficient ES cells.** (A) Immunostaining patterns of ES cells with antibodies against methylated or acetylated histone. *Eed4* cKO ES cells were subjected to staining with Hoechst or immunostaining using anti-H3K27me3, H3Ac, H4Ac, and H3K56Ac antibodies. Inset, image with higher magnification. Note that the pattern of immunostaining shows a good correspondence with that of nuclear staining by Hoechst. Scale bar = 200  $\mu$ m. (B) Fluorescence intensities of images shown in Figure 4A were measured using image analysis software, NIH image J.

**Figure S4 *Elp3* and *Tip60* overcome the phenotype of *Eed*-deficient ES cells.** *Eed4* cKO ES cells transfected with control, Flag-*Elp3*, or Flag-*Tip60* expression vector were cultured in the presence or absence of Tet for 4 days. (A, B) Histone acetylation levels are maintained in *Elp3*- or *Tip60*-expressing, *Eed*-deficient ES cells. (A) Fluorescence intensities of images shown in Figure 6A were measured using NIH image J. (B) The amounts of H3Ac and H4Ac in the indicated cells were determined by ELISA. Data are presented as fold changes relative to the untreated control sample. (C) Loss of H3K37me3 in the promoter regions of differentiation-associated genes in *Eed*-deficient ES cells is not restored by the expression of *Elp3* or *Tip60*. The indicated cells were subjected to ChIP assay with an anti-H3K37me3 antibody,

followed by qPCR using primers for the promoter regions of the indicated genes.

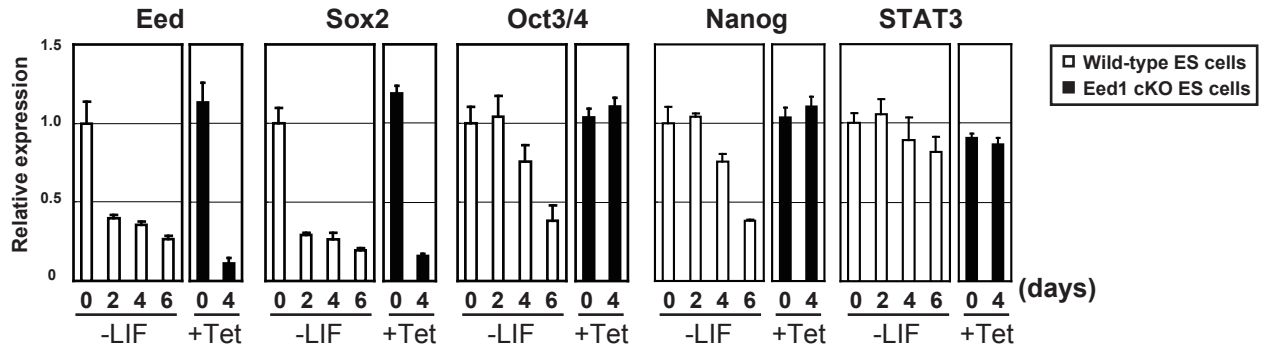

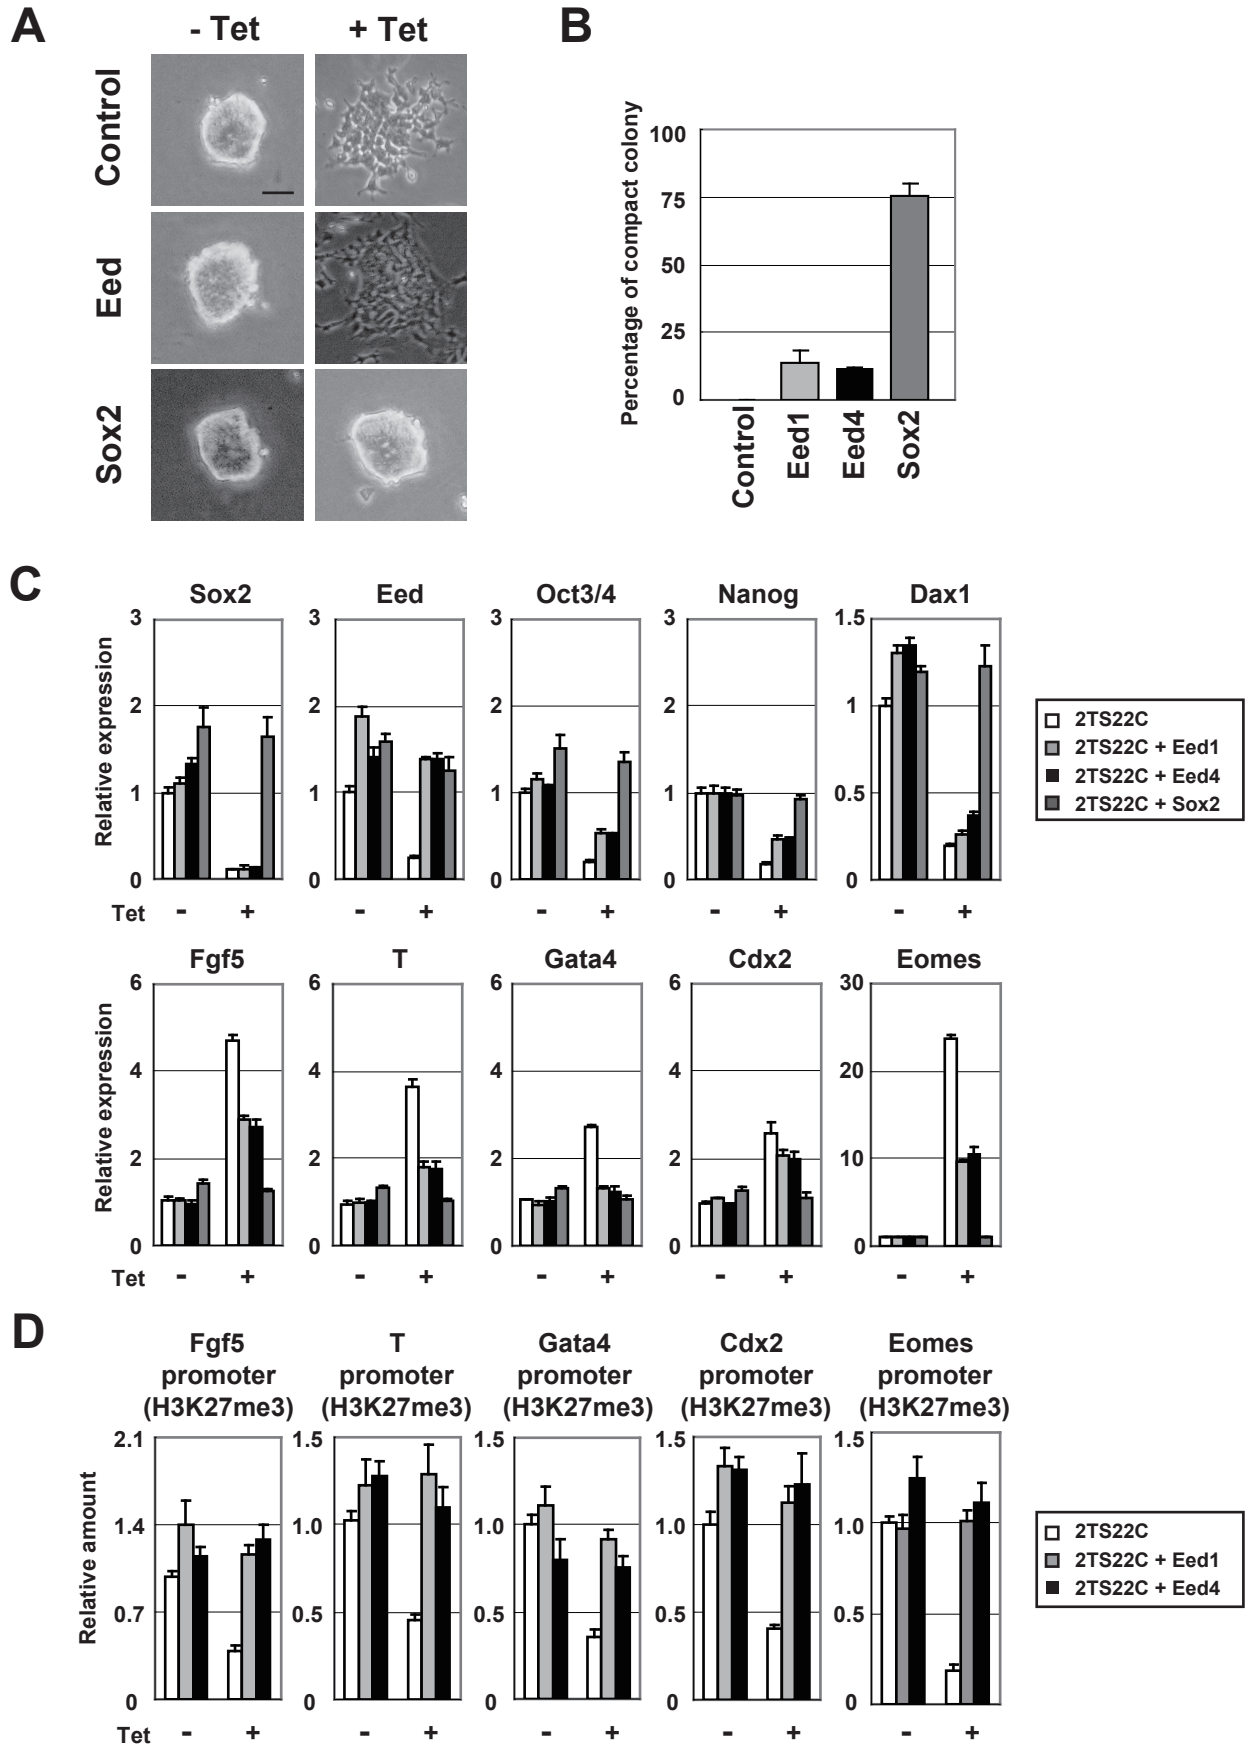



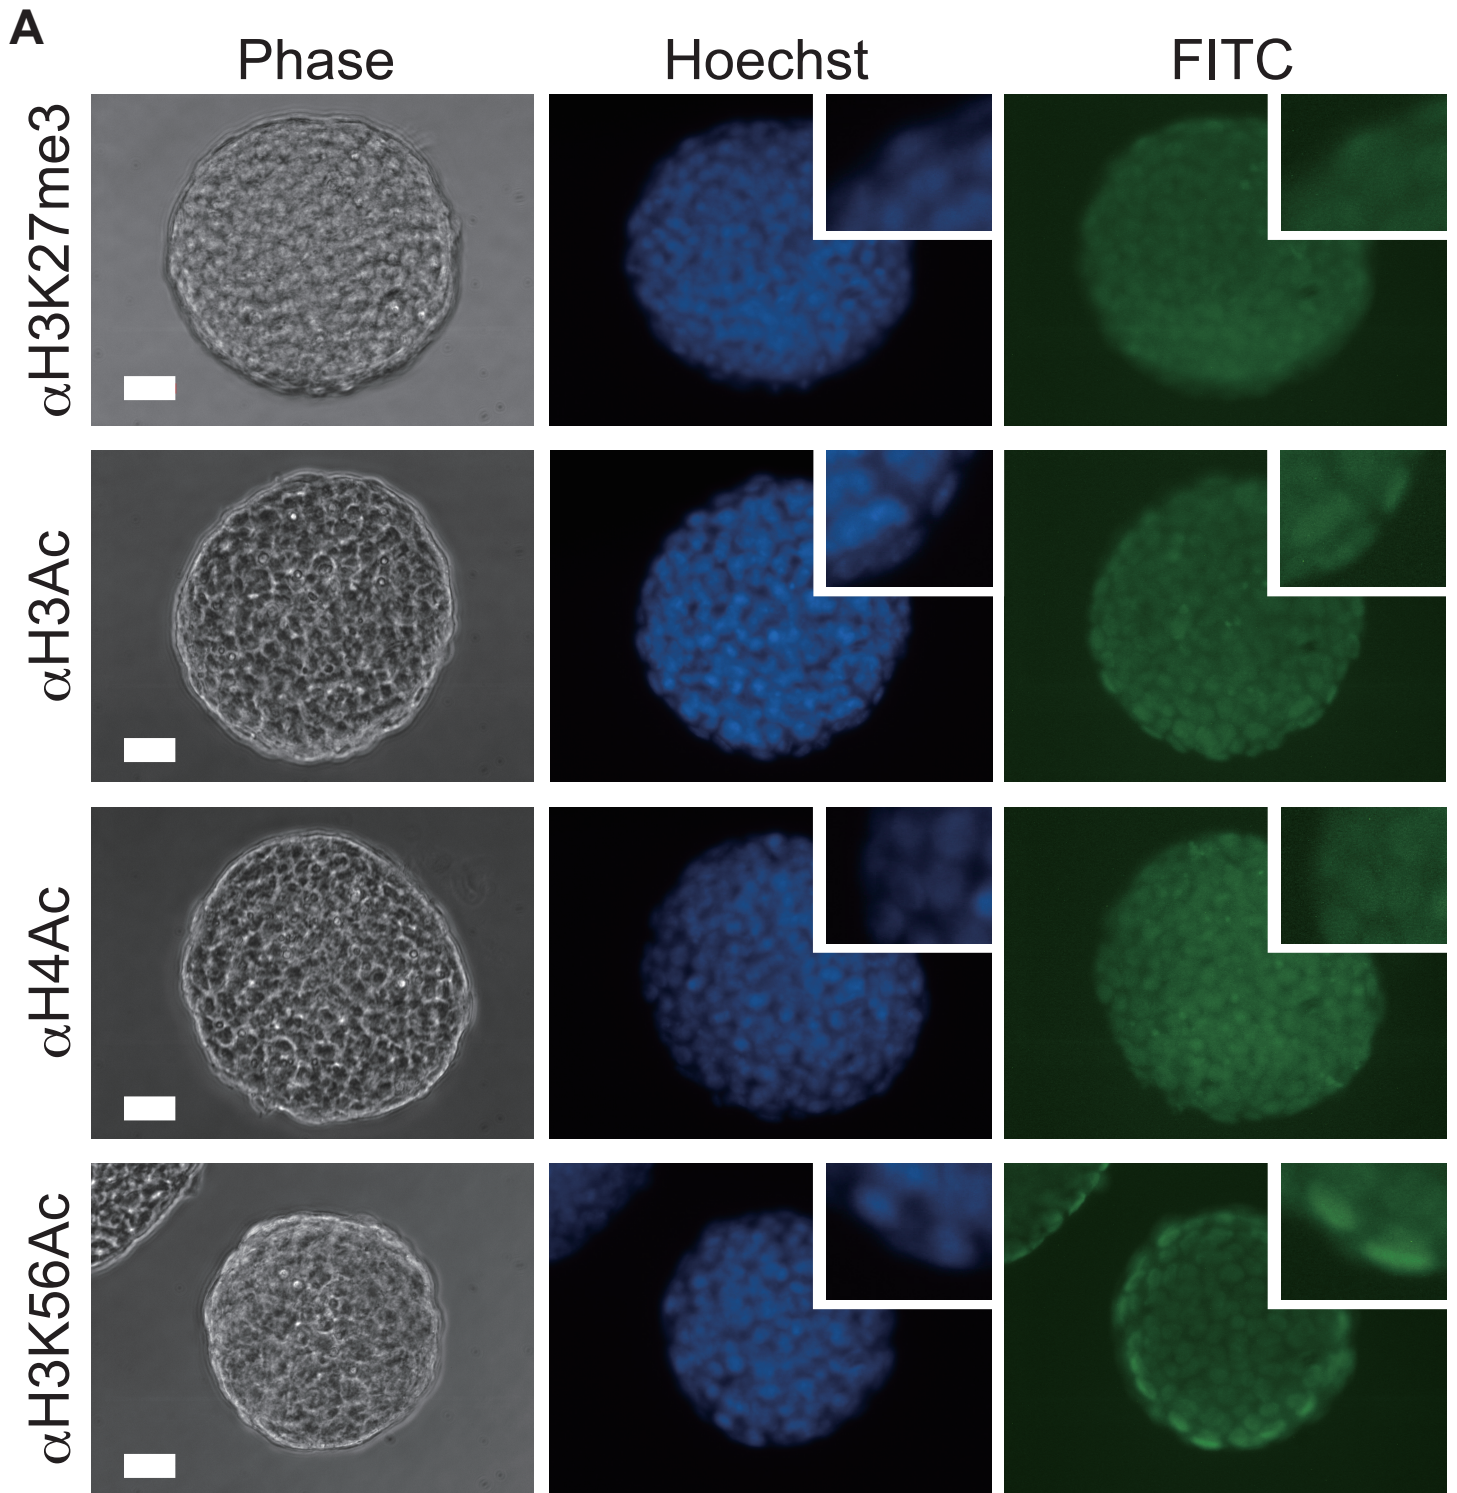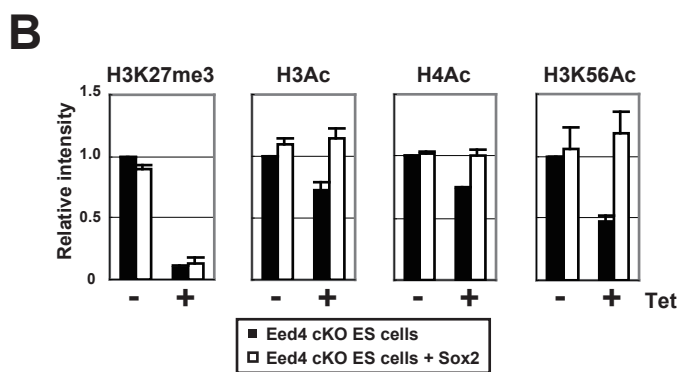

**A**

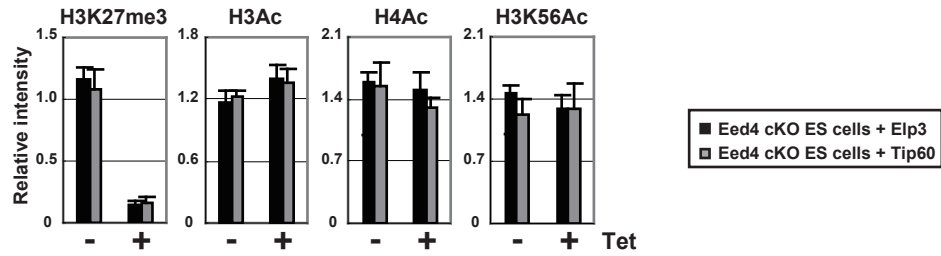

**B**

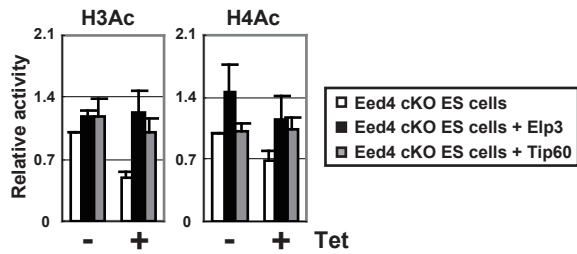

**C**

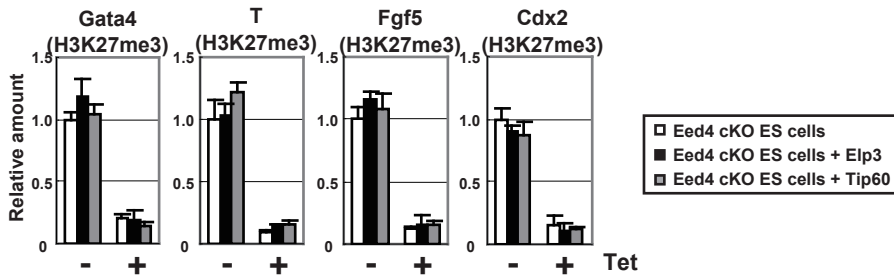

Supplement: emboj2011126s1.pdf [file emboj2011126s1.pdf]
